# Supplementary material for: Identification of common predisposing loci to hematopoietic cancers in four dog breeds
Source: PLoS Genet. 2021 Apr 1;17(4):e1009395. doi: 10.1371/journal.pgen.1009395 (PMC8016107; doi:10.1371/journal.pgen.1009395)
Supplement: S2 Table — (XLSX) [file pgen.1009395.s009.xlsx]

## Sheet: Feuil1
S2 Table. Risk modeling of histiocytic sarcoma (HS).
	Coefficients:
Model with Stepwise Forward selection based on a 0.05 alpha inclusion and exclusion threshold		Estimate	Std. Error	P value
	(Intercept)	-0.24461	0.13396	0.068202	.
	chr11_41252822	0.30100	0.05502	5.91e-08	***
	chr5_30488801	0.21307	0.06817	0.001836	**
	chr14_10665001	0.11450	0.02313	8.97e-07	***
	chr2_34223001	0.07109	0.02159	0.001034	**
	chr14_4515710	0.15507	0.03802	4.95e-05	***
	chr5_26626153	0.10530	0.02983	0.000438	***
	chr2_29653137	0.13536	0.03469	0.000103	***
	chr11_40696116	-0.17514	0.05863	0.002899	**
	chr5_34256382	0.09756	0.02980	0.001105	**
	chr5_30494137	-0.17451	0.06912	0.011768	*
	chr11_33366095	0.10844	0.02544	2.25e-05	***
	chr11_34716792	-0.14392	0.03830	0.000183	***
	chr11_38364665	0.26075	0.07732	0.000780	***
	chr11_44557666	0.14123	0.04231	0.000881	***
	chr11_42158801	0.10651	0.04386	0.015377	*
	chr11_38481723	-0.16627	0.07405	0.025003	*
Model with Stepwise Forward and backward		Estimate	Std. Error	P value
	(Intercept)	-0.26544	0.13290	0.046124	*
	chr11_41215628	0.29610	0.05642	1.95e-07	***
	chr11_45008486	-0.17141	0.07333	0.019648	*
	chr14_8139720	0.07248	0.04288	0.091371	.
	chr14_10665001	0.10688	0.02379	8.04e-06	***
	chr11_45980905	0.20720	0.07540	0.006125	**
	chr2_34223001	0.07235	0.02151	0.000805	***
	chr2_29653137	0.13162	0.03567	0.000239	***
	chr5_30488801	0.23403	0.06896	0.000722	***
	chr14_4515710	0.09643	0.05035	0.055823	.
	chr5_26626153	0.11509	0.02980	0.000121	***
	chr11_40696116	-0.19738	0.06541	0.002626	**
	chr5_34256382	0.10340	0.03034	0.000687	***
	chr5_30494137	-0.21443	0.06962	0.002139	**
	chr11_33366095	0.10993	0.02568	2.07e-05	***
	chr11_34716792	-0.15589	0.03958	8.87e-05	***
	chr11_38364665	0.26249	0.07843	0.000854	***
	chr11_44557666	0.12192	0.04623	0.008515	**
	chr11_42158801	0.11406	0.04389	0.009529	**
	chr11_38481723	-0.13938	0.07520	0.064151	.
