# Supplementary material for: Identification of common predisposing loci to hematopoietic cancers in four dog breeds
Source: PLoS Genet. 2021 Apr 1;17(4):e1009395. doi: 10.1371/journal.pgen.1009395 (PMC8016107; doi:10.1371/journal.pgen.1009395)
Supplement: S3 Table — For chromosomes 14 and 5, the association analyses were performed by taking into account the information of the best SNV of chromosome 11 (CFA11:41252822). (XLSX) [file pgen.1009395.s010.xlsx]

## Sheet: Feuil1
	S3 Table. Top 10 variants identified in chromosomes 11, 14, and 5 loci after imputation of captured variants on 455 histiocytic sarcoma (HS) cases and 408 controls from Bernese mountain dog (BMD), Rottweiler, and flat-coated retriever (FCR) breeds. For chromosomes 14 and 5, the association analyses were performed by taking into account the information of the best SNV of chromosome 11 (CFA11:41252…
	Variant	Chromosome	Position	A1	A2	P value	Pcorrected
GWAS using no covariate	AX-167601774_11_41252822	11	41252822	T	C	1.64E-25	5.52E-12
	SNPcapture_11_41175498	11	41175498	T	A	1.44E-24	1.44E-11
	AX-167216997_BICF2P122855_11_41176819	11	41176819	A	G	1.44E-24	1.44E-11
	indel_49	11	41216757	G	A	1.60E-24	1.51E-11
	AX-167664066_11_41161357	11	41161357	T	G	1.66E-24	1.53E-11
	SNPcapture_11_41161357bis	11	41161357	T	G	1.66E-24	1.53E-11
	AX-168281734_BICF2S23134137_11_41161441	11	41161441	T	C	1.66E-24	1.53E-11
	AX-168107901_11_41163558	11	41163558	T	C	1.66E-24	1.53E-11
	SNPcapture_11_41163558bis	11	41163558	T	C	1.66E-24	1.53E-11
	AX-167265610_11_41166847	11	41166847	A	C	1.66E-24	1.53E-11
GWAS using AX-167601774_11_41252822 as covariate	SNPcapture_14_10709621	14	10709621	T	C	7.70E-12	6.68E-07
	AX-168073054_14_11021670	14	11021670	A	G	9.55E-12	7.50E-07
	indel_27725	14	11042153	A	G	1.03E-11	7.81E-07
	AX-167978636_14_10665001	14	10665001	G	A	1.07E-11	7.96E-07
	SNPcapture_14_11024488	14	11024488	A	G	1.10E-11	8.09E-07
	SNPcapture_14_11026493	14	11026493	T	C	1.10E-11	8.09E-07
	SNPcapture_14_11026639	14	11026639	C	T	1.10E-11	8.09E-07
	SNPcapture_14_11026731	14	11026731	A	T	1.10E-11	8.09E-07
	AX-168233524_BICF2P899346_14_11004636	14	11004636	A	C	1.12E-11	8.18E-07
	SNPcapture_14_11004636	14	11004636	A	C	1.12E-11	8.18E-07
	SNPcapture_5_30488886	5	30488886	G	A	1.32E-10	3.07E-06
	SNPcapture_5_30489203	5	30489203	G	C	1.61E-10	3.42E-06
	SNPcapture_5_30489217	5	30489217	T	C	1.61E-10	3.42E-06
	AX-167250226_BICF2G630182217_5_30496048	5	30496048	T	C	1.61E-10	3.42E-06
	SNPcapture_5_30491343	5	30491343	C	T	1.73E-10	3.56E-06
	SNPcapture_5_30483338	5	30483338	G	A	1.99E-10	3.83E-06
	SNPcapture_5_30485505	5	30485505	A	G	1.99E-10	3.83E-06
	SNPcapture_5_30486583	5	30486583	G	A	1.99E-10	3.83E-06
	SNPcapture_5_30488559	5	30488559	G	A	1.99E-10	3.83E-06
	SNPcapture_5_30488801	5	30488801	T	A	1.99E-10	3.83E-06
